# Supplementary material for: Cytotoxic and Antibacterial Angucycline- and Prodigiosin- Analogues from the Deep-Sea Derived Streptomyces sp. SCSIO 11594
Source: Mar Drugs. 2015 Mar 16;13(3):1304–16. doi: 10.3390/md13031304 (PMC4377985; doi:10.3390/md13031304)
Supplement: Supplementary File 1 [file marinedrugs-13-01304-s001.pdf]

## Supplementary Information

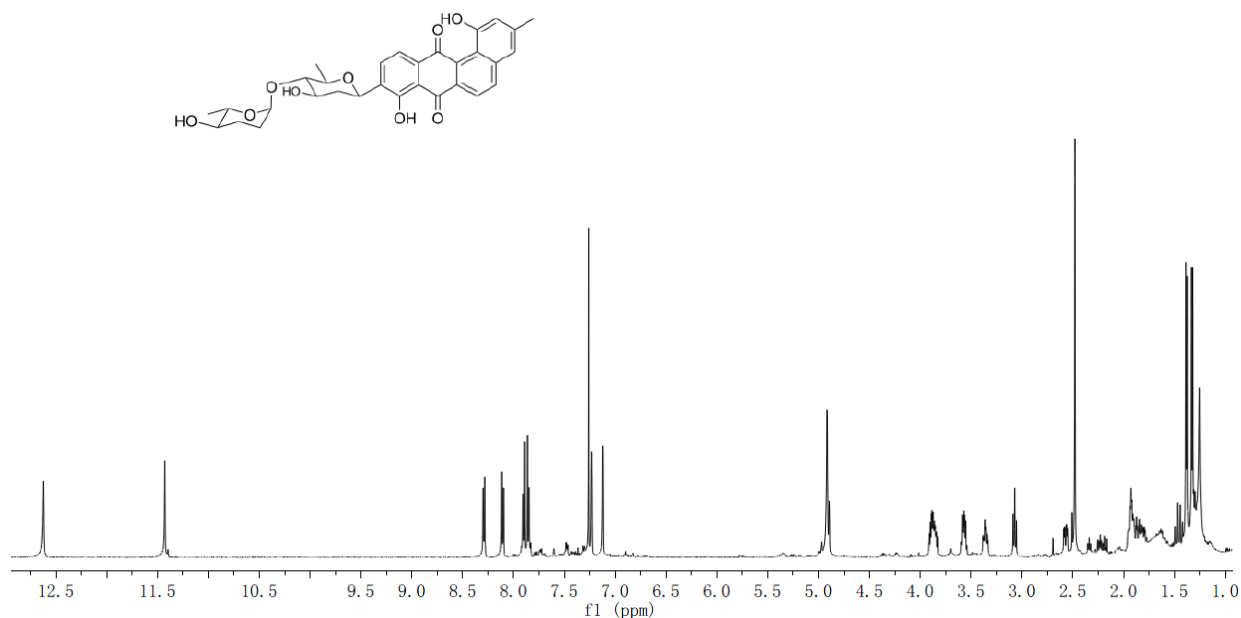

**Figure S1.** <sup>1</sup>H NMR (500 MHz) spectrum of **1** in CDCl<sub>3</sub>.

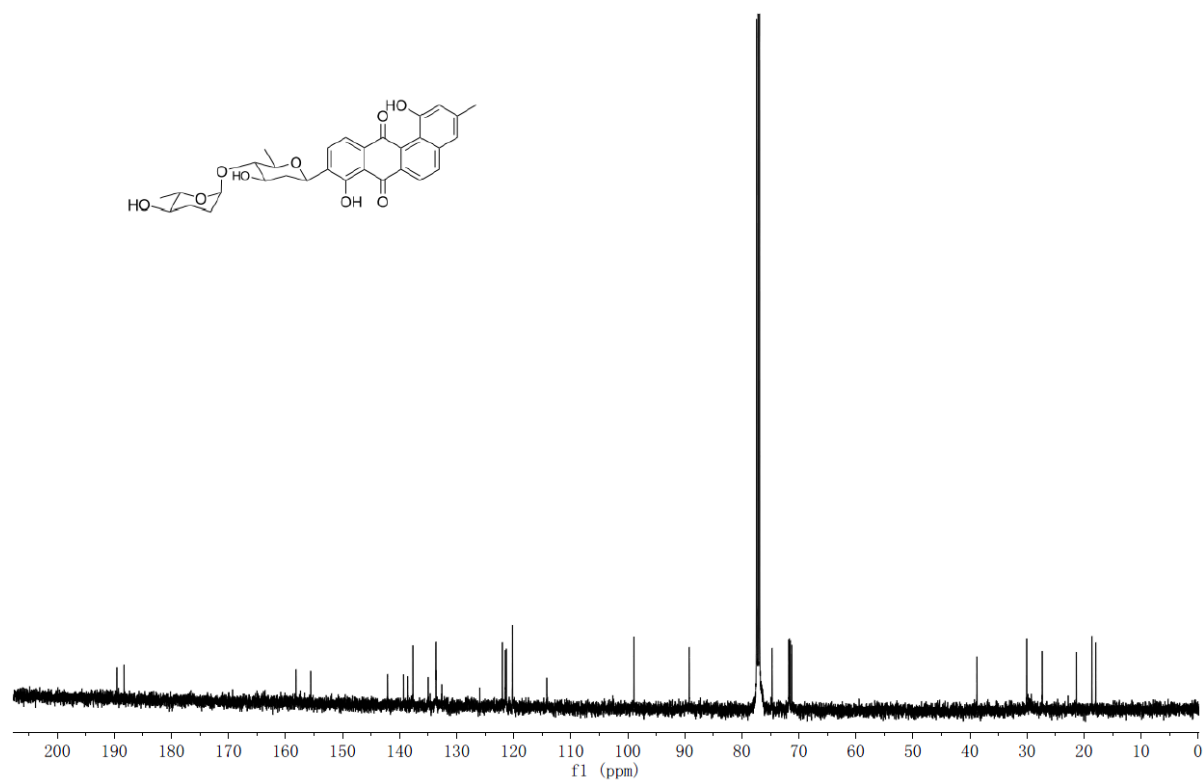

**Figure S2.** <sup>13</sup>C NMR (125 MHz) spectrum of **1** in CDCl<sub>3</sub>.

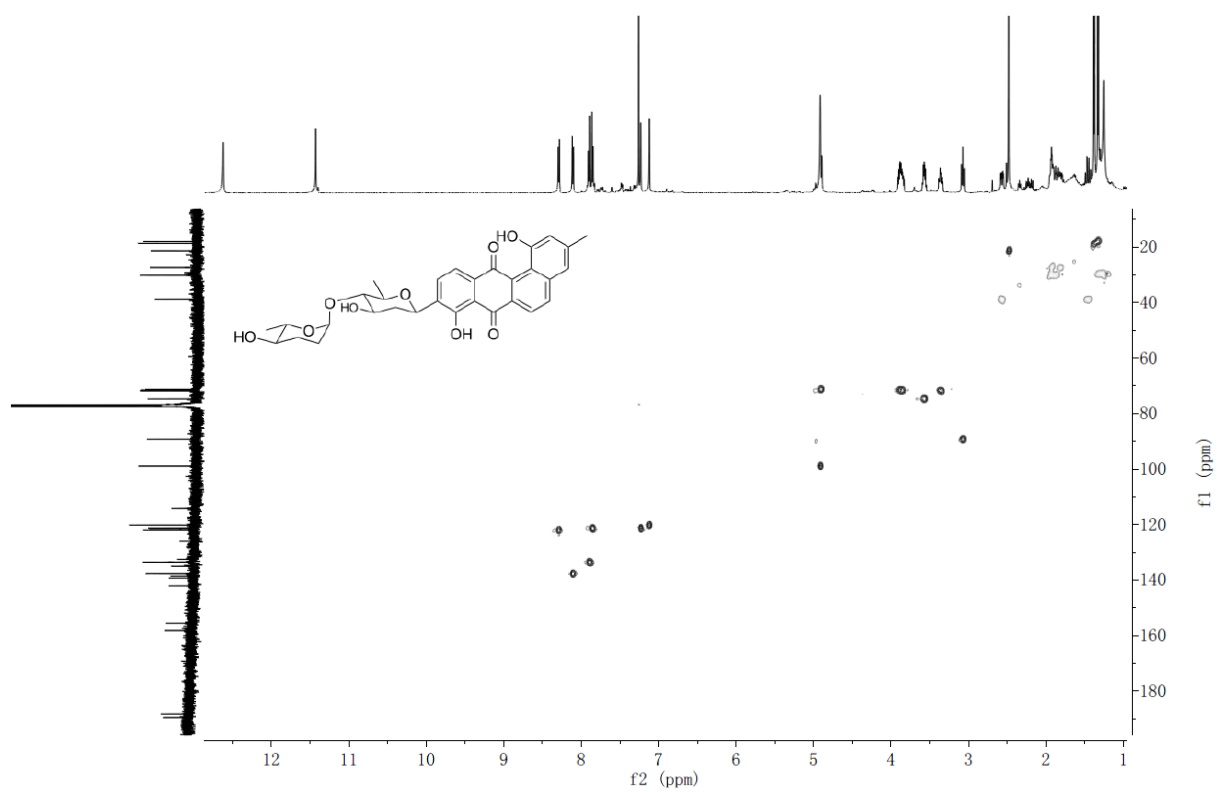

**Figure S3.** HMBC spectrum of **1** in CDCl<sub>3</sub>.

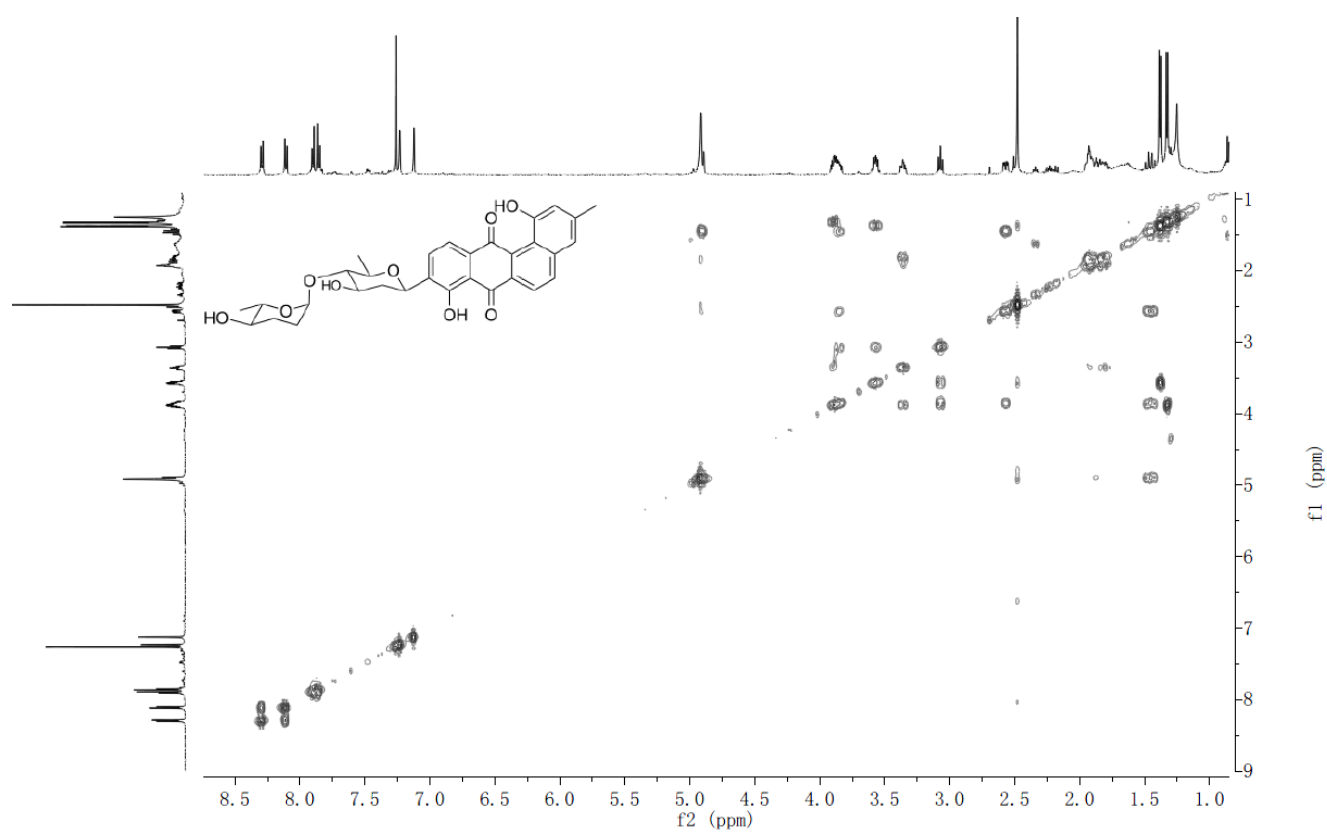

**Figure S4.** <sup>1</sup>H-<sup>1</sup>H COSY spectrum of **1** in CDCl<sub>3</sub>.

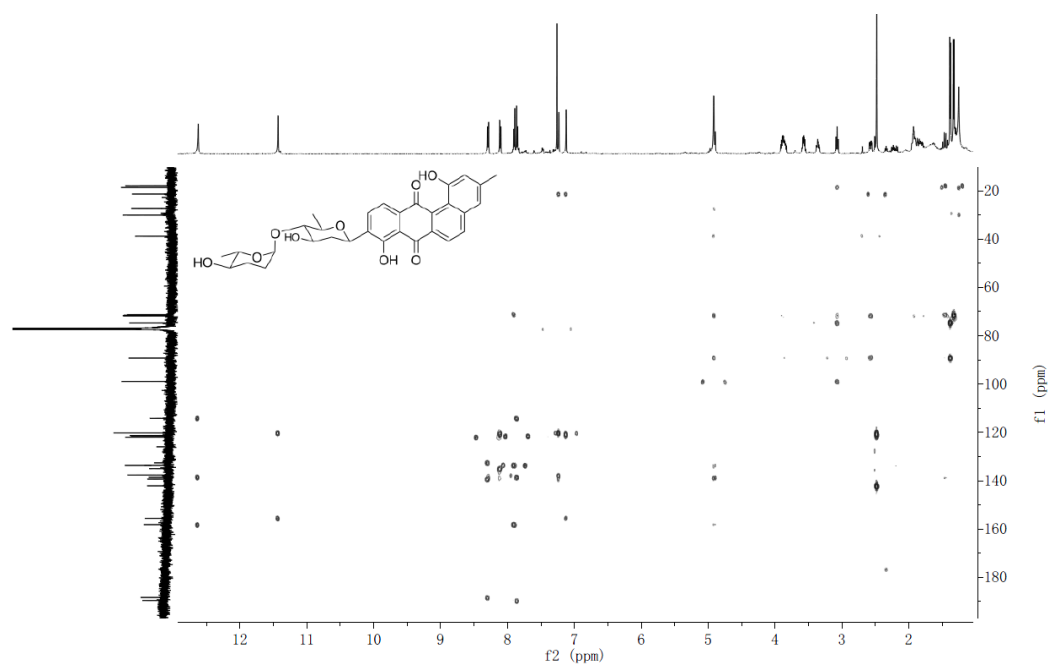

**Figure S5.** HMBC spectrum of **1** in  $\text{CDCl}_3$ .

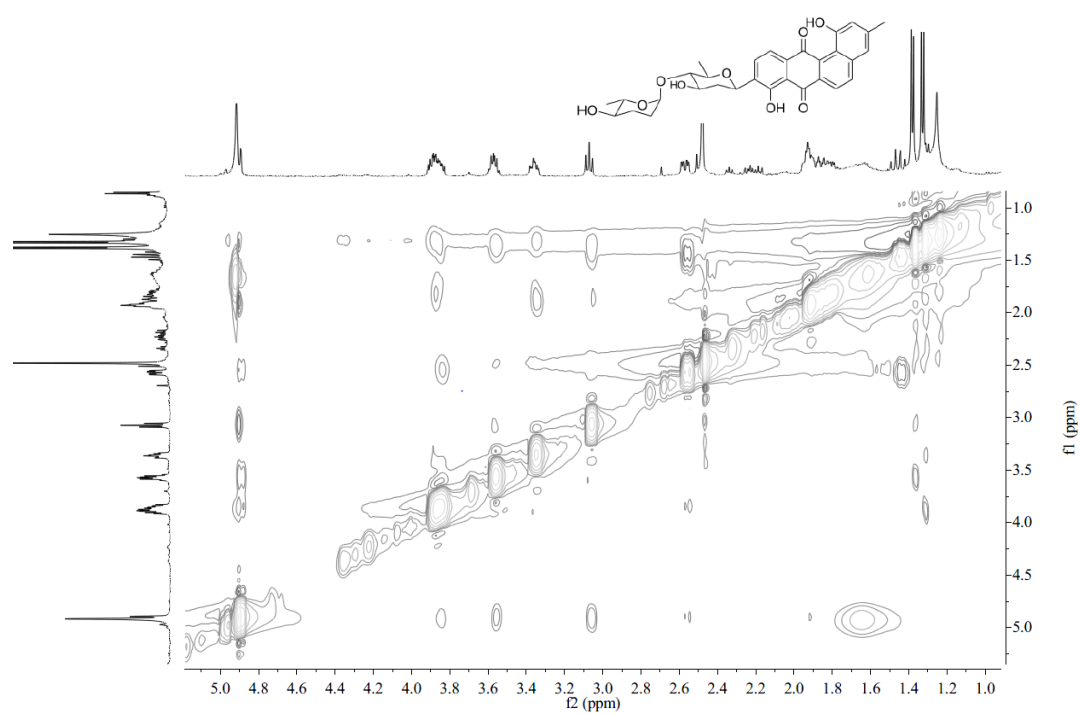

**Figure S6.** NOESY spectrum of **1** in  $\text{CDCl}_3$ .

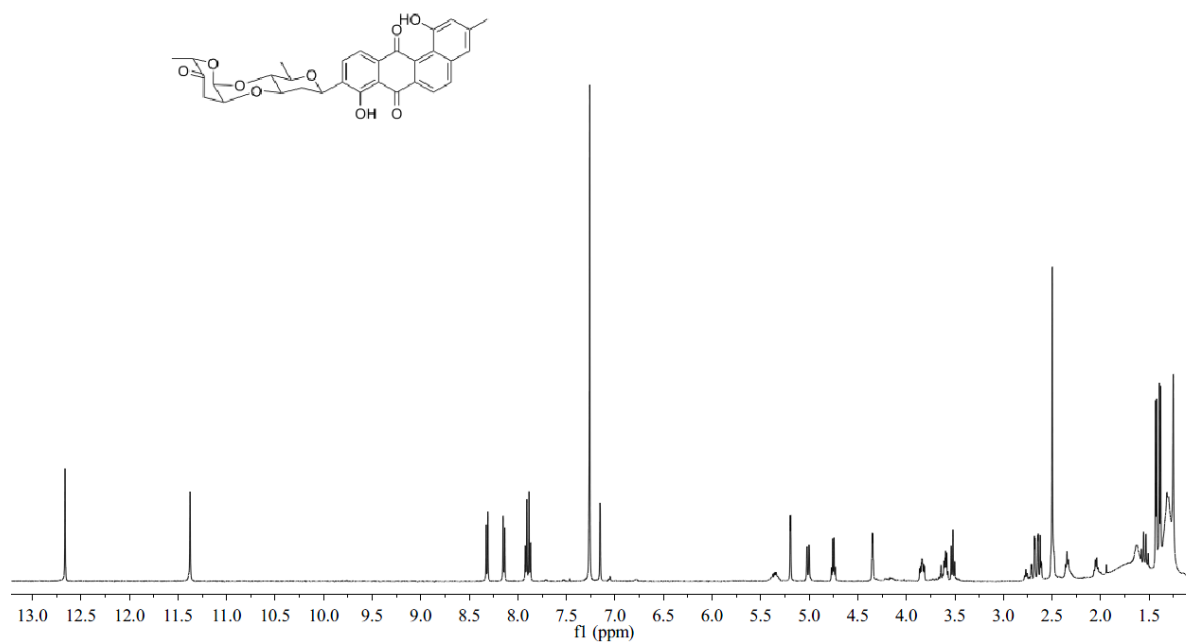

**Figure S7.**  $^1\text{H}$  NMR (500 MHz) spectrum of **2** in  $\text{CDCl}_3$ .

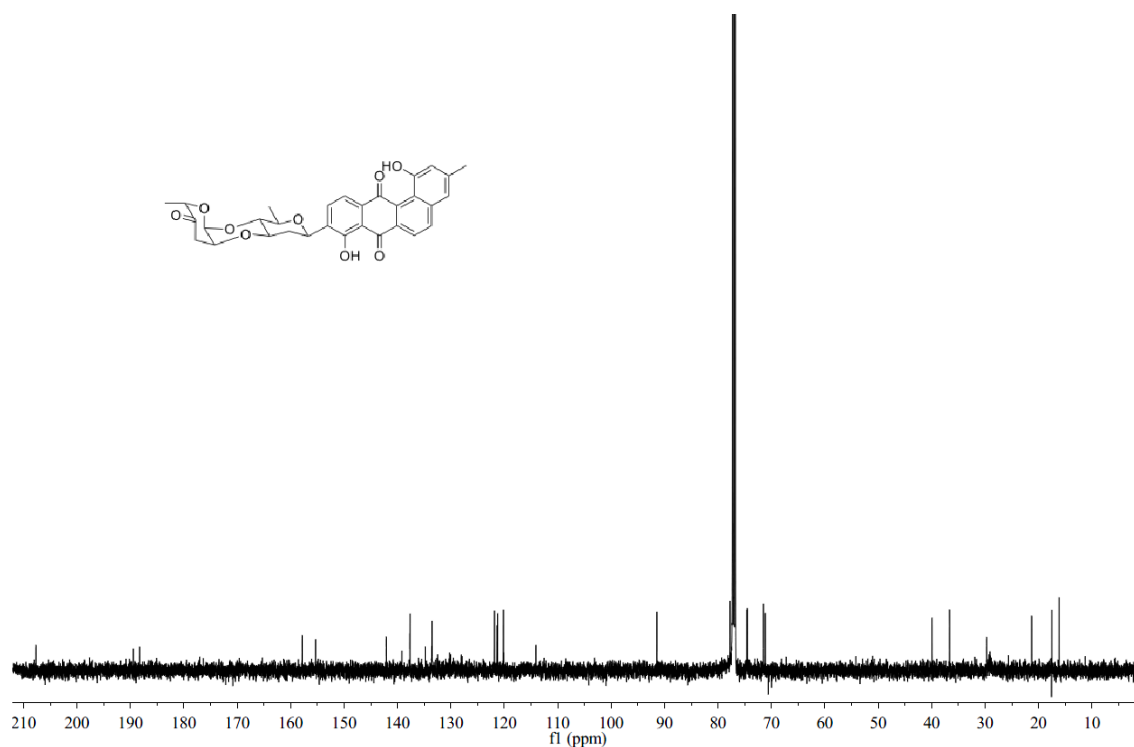

**Figure S8.**  $^{13}\text{C}$  NMR (125 MHz) spectrum of **2** in  $\text{CDCl}_3$ .

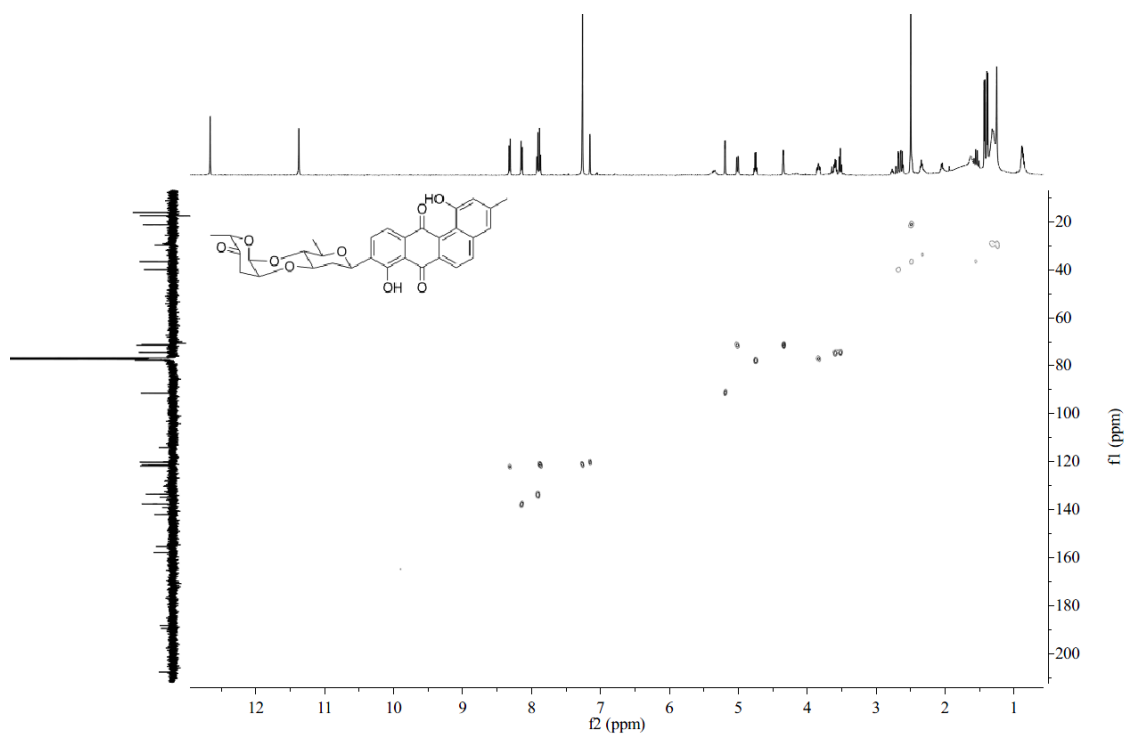

**Figure S9.** HMQC spectrum of **2** in  $\text{CDCl}_3$ .

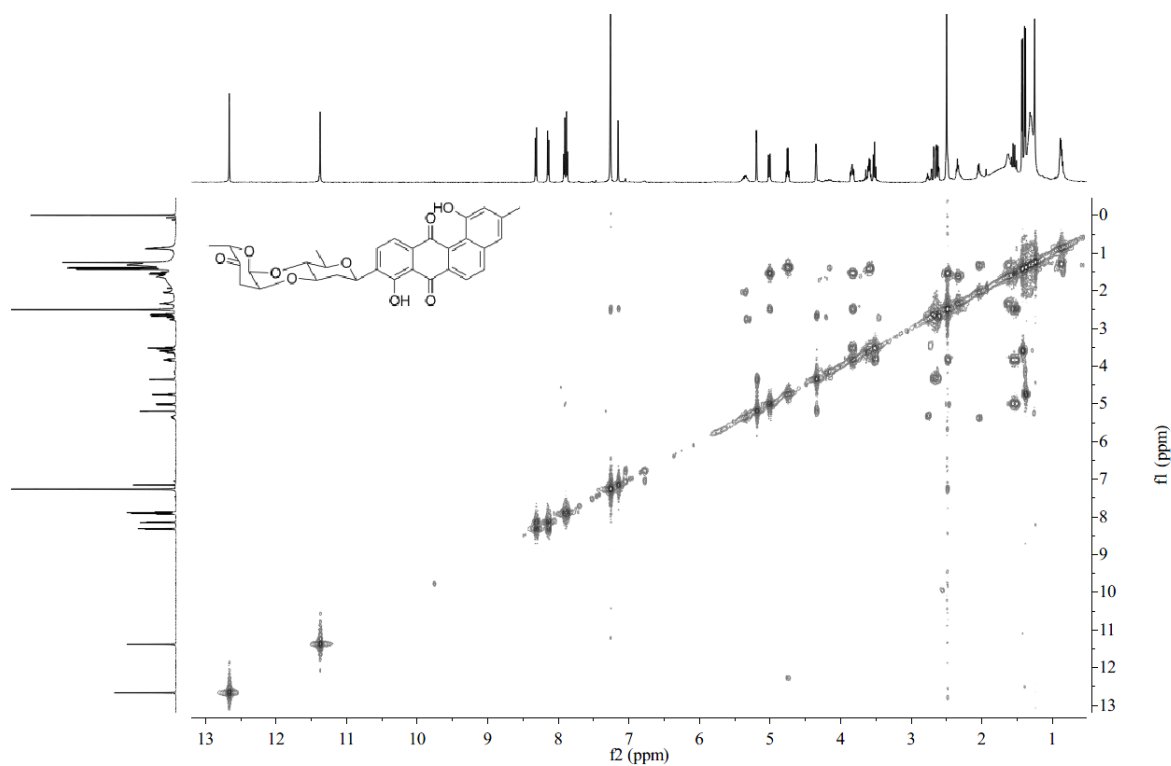

**Figure S10.**  $^1\text{H}$ - $^1\text{H}$  COSY spectrum of **2** in  $\text{CDCl}_3$ .

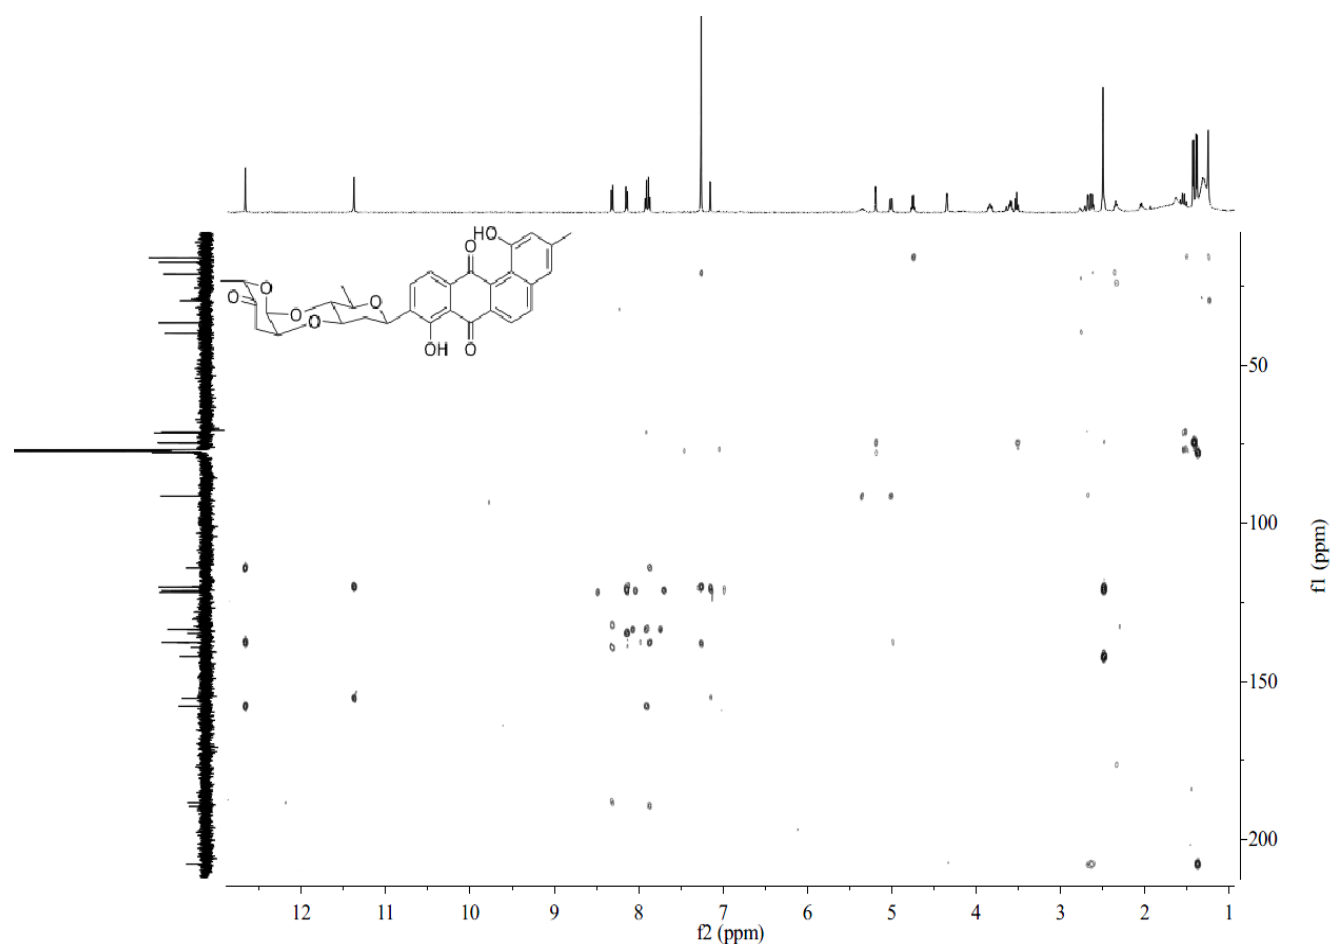

**Figure S11.** HMBC spectrum of **2** in CDCl<sub>3</sub>.

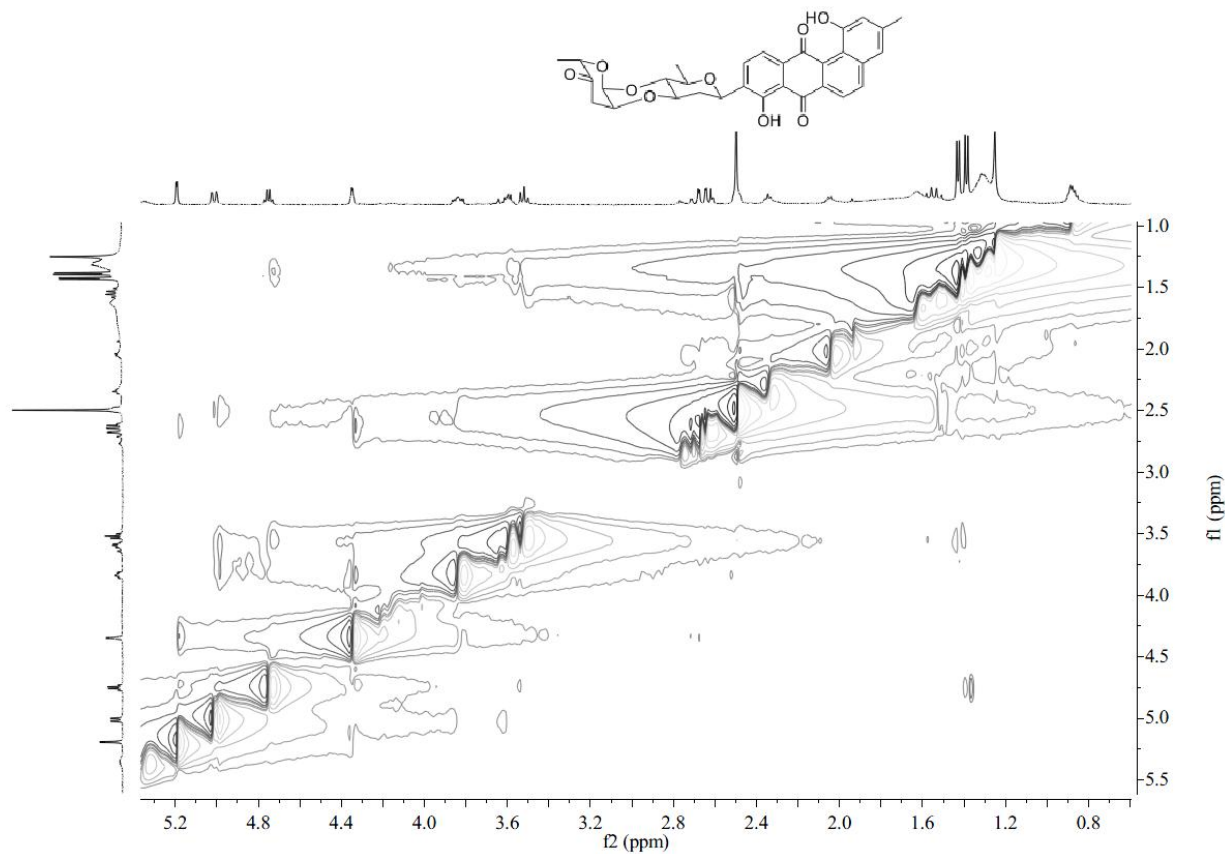

**Figure S12.** NOESY spectrum of **2** in  $\text{CDCl}_3$ .

© 2015 by the authors; licensee MDPI, Basel, Switzerland. This article is an open access article distributed under the terms and conditions of the Creative Commons Attribution license (<http://creativecommons.org/licenses/by/4.0/>).
